# Supplementary material for: Data-Driven Assessment on the Brazilian Regulatory Framework for Biodiversity Access and Benefit Sharing (ABS)
Source: Preprints.org preprint supplement (doi:10.20944/preprints202212.0106.v1), 2022-12-07
Supplement: Supplementary file 2 [file Appendix A.docx]

Appendix A

**CONSULTATIONS** **and APPELATIONS** addressed to the Brazilian Government authorities via [Law on Access to Information](https://www.planalto.gov.br/ccivil_03/_ato2011-2014/2011/lei/l12527.htm) (LAI), successively and systematically, from 2017 to 2022 (in chronological reverse order).

LIST OF CONSULTATIONS

| **#** | **Consultation**  **Protocol** | **Protocol Date** | **Brazilian**  **Authority** |
| --- | --- | --- | --- |
| 1 | 01217.008854/2022-85 | 15/08/2022 | Ministry of Science and Technology |
| 2 | 02303.008414/2022-11 | 15/08/2022 | Ministry of the Environment |
| 3 | 02303.008412/2022-22 | 15/08/2022 | Ministry of the Environment |
| 4 | 02303.008413/2022-77 | 15/08/2022 | Ministry of the Environment |
| 5 | 02303.008415/2022-66 | 15/08/2022 | Ministry of the Environment |
| 6 | 02303.003819/2022-63 | 07/04/2022 | Ministry of the Environment |
| 7 | 02303.003781/2022-29 | 06/04/2022 | Ministry of the Environment |
| 8 | 02303.003782/2022-73 | 06/04/2022 | Ministry of the Environment |
| 9 | 02303.003783/2022-18 | 06/04/2022 | Ministry of the Environment |
| 10 | 02303.003785/2022-15 | 06/04/2022 | Ministry of the Environment |
| 11 | 21210.002402/2022-67 | 02/03/2022 | Ministry of Agriculture |
| 12 | 02303.008663/2021-26 | 22/09/2021 | Ministry of the Environment |
| 13 | 60000.001519/2021-70 | 22/09/2021 | Brazilian Navy |
| 14 | 21210.012577/2021-00 | 22/09/2021 | Ministry of Agriculture |
| 15 | 02303.007626/2021-09 | 26/08/2021 | Ministry of the Environment |
| 16 | 02303.007588/2021-86 | 25/08/2021 | Ministry of the Environment |
| 17 | 02303.007587/2021-31 | 25/08/2021 | Ministry of the Environment |
| 18 | 02303.004294/2021-01 | 13/05/2021 | Ministry of the Environment |
| 19 | 02303.004264/2021-96 | 12/05/2021 | Ministry of the Environment |
| 20 | 02303.004263/2021-41 | 12/05/2021 | Ministry of the Environment |
| 21 | 02303.008914/2020-91 | 28/12/2020 | Ministry of the Environment |
| 22 | 02303.008910/2020-11 | 28/12/2020 | Ministry of the Environment |
| 23 | 02303.008916/2020-81 | 28/12/2020 | Brazilian Institute of the Environment and Renewable Natural Resources |
| 24 | 02303.008915/2020-36 | 28/12/2020 | Ministry of the Environment |
| 25 | 02303.008280/2020-77 | 03/12/2020 | Ministry of the Environment |
| 26 | 02303.008278/2020-06 | 03/12/2020 | Ministry of the Environment |
| 27 | 02303.008279/2020-42 | 03/12/2020 | Ministry of the Environment |
| 28 | 02303.005001/2020-13 | 01/09/2020 | Ministry of the Environment |
| 29 | 02303.004999/2020-39 | 01/09/2020 | Ministry of the Environment |
| 30 | 02303.005000/2020-79 | 01/09/2020 | Ministry of the Environment |
| 31 | 02680.001151/2020-51 | 05/05/2020 | Ministry of the Environment |
| 32 | 02680.001152/2020-03 | 05/05/2020 | Ministry of the Environment |
| 33 | 02680.003297/2019-05 | 28/11/2019 | Ministry of the Environment |
| 34 | 02680.002322/2019-25 | 17/09/2019 | Ministry of the Environment |
| 35 | 02680.002325/2019-69 | 17/09/2019 | Ministry of the Environment |
| 36 | 02680.001852/2019-56 | 09/08/2019 | Ministry of the Environment |
| 37 | 02680.001853/2019-09 | 09/08/2019 | Ministry of the Environment |
| 38 | 02680.001850/2019-67 | 09/08/2019 | Ministry of the Environment |
| 39 | 02680.001851/2019-10 | 09/08/2019 | Ministry of the Environment |
| 40 | 02680.001168/2019-74 | 21/05/2019 | Ministry of the Environment |
| 41 | 02680.000222/2019-64 | 28/01/2019 | Ministry of the Environment |
| 42 | 02680.000186/2019-39 | 24/01/2019 | Ministry of the Environment |
| 43 | 02680.001573/2018-10 | 22/08/2018 | Ministry of the Environment |
| 44 | 02680.001571/2018-12 | 22/08/2018 | Ministry of the Environment |
| 45 | 02680.001569/2018-43 | 22/08/2018 | Ministry of the Environment |
| 46 | 02680.001428/2018-21 | 30/07/2018 | Ministry of the Environment |
| 47 | 02680.001427/2018-86 | 30/07/2018 | Ministry of the Environment |
| 48 | 02680.001426/2018-31 | 30/07/2018 | Ministry of the Environment |
| 49 | 02680.000090/2017-17 | 17/01/2017 | Brazilian Institute of the Environment and Renewable Natural Resources (IBAMA) |
| 50 | 02680.000089/2017-84 | 17/01/2017 | Ministry of the Environment |
| 51 | 02680.000093/2017-42 | 17/01/2017 | Brazilian Institute of the Environment and Renewable Natural Resources (IBAMA) |

LIST OF APPELATIONS

| **#** | **Appeal filled by Brazilian Authority** | **Origin of**  **Consultation** | **Instance** | **Appeal**  **Date** | **Appeal Deadline** | **Status** | **Type** | **Appeal Response** |
| --- | --- | --- | --- | --- | --- | --- | --- | --- |
| 1 | Ministry of the Environment | Ministry of the Environment | First | 29/08/2022 | 05/09/2022 | Responded | Incomplete information | 02/09/2022 |
| 2 | Ministry of the Environment | Ministry of the Environment | First | 25/10/2021 | 03/11/2021 | Responded | Incomplete information | 03/11/2021 |
| 3 | Ministry of the Environment | Ministry of the Environment | First | 16/09/2021 | 21/09/2021 | Responded | Incomplete information | 21/09/2021 |
| 4 | Ministry of the Environment | Ministry of the Environment | First | 25/05/2020 | 01/06/2020 | Responded | Incomplete information | 01/06/2020 |
| 5 | Ministry of the Environment | Ministry of the Environment | First | 22/10/2019 | 29/10/2019 | Responded | Incomplete information | 29/10/2019 |
