# Supplementary material for: Data-Driven Assessment on the Brazilian Regulatory Framework for Biodiversity Access and Benefit Sharing (ABS)
Source: Preprints.org preprint supplement (doi:10.20944/preprints202212.0106.v1), 2022-12-07
Supplement: Supplementary file 3 [file Appendix B.docx]

Appendix B

QUESTIONS TO AUTHORITIES

To acquire precise and specific data to do the Brazilian ABS system assessment, formal requests to the Brazilian authorities were submitted frequently over the years. The enquiries encompass questions like **“what is the most updated data on”**

Registrations

- Total number of users registered at SisGen.
- Total number of institutions valid registration at SisGen.
- Number of registrations in SisGen by purpose: Adequacy; Regularization; New activities
- Total number of Terms of Commitment (TC) received by CGen; Total number of TC already signed by MMA; Total number of TC returned to users by MMA with errors/rectification
- Total combined number of GH and ATK access activities registered.
- Number of accessed ATK by origin: unidentified ATK; ATK identified with provider; ATK of secondary source.
- Total number of access activities registered per modality: Only with GH; With GH + ATK; Only with ATK.
- Total number of notifications received; Total number of finished product notifications; Total number of reproductive material notifications.
- Total number of notifications per BS option: Total notification for monetary BS; Total notification for non-monetary BS; Total notification exempted of BS.
- Total registration numbers of access to GH by origin: In situ; Ex-situ - trade; Ex-situ - cultivation/ slaughterhouse; Ex-situ - collections; In silico (DSI); Intermediate product.
- GH registration numbers per biological group: Flora (except algae); Fauna; Microorganisms; Fungi; Algae; Virus; with no identification.
- Total number of registered activities that comply with the verification step by CGen; the number of activities effectively verified and approved by CGen; the number of activities not approved in the verification procedure and the number of activities automatically approved by CGen after deadline expiration time over the verification procedure.
- Total number of prior authorizations (PIC) for access to identified source ATK granted by providers to users.
- Prior Authorization/Consent Numbers: Total number of applications for prior authorizations/ registration /requested consents; Total number of prior commitments/consents granted; Total number of prior commitments/non-granted commitments.

Monetary and non-monetary benefit-sharing

- Overall value of invoices (GRUs in Portuguese) already issued by BNDES under the title of "Monetary BS" to users.
- Total number of individual users who paid Monetary BS.
- Total amount paid by users under the heading of "Monetary BS" for only the fiscal year 20xx.
- Total balance of monetary resources paid by users to the BSNF to date.
- Total amount of monetary BS already added in the BSNF, by its origins as: BS from adequacy activities; BS from regularization activities (with signed Term of Commitment) in; BS of new registered activities.
- Total amount already received by the BSNF by source of revenue (Art. 96 of Decree 8,772/2016), as: Appropriations in the annual budget law and its additional credits; Donations; Amounts collected with the payment of administrative fines applied due to non-compliance with Law 13.123/2015.
- Financial resources of external origin arising from contracts, agreements, or agreements specially reserved for the purposes of the Fund; Contributions made by GH and ATK users to the PNBS; Other revenues.
- Projects and investments developed with FNBS resources: Total number of projects submitted to receive BSNF resources; Total of cumulative equivalent value of these projects; Total of projects which received BSNF resources contribution; Total amount of BS invested by the BSNF in projects.
- Value of "Non-Monetary BS" – Agreement between users and the Union: Total number of Non-Monetary-BS agreements with the Union received; Total number of Non-Monetary-BS agreements signed with the Union; Total of the equivalent value (R$) of Non-Monetary-BS agreements signed between users and the Union; Total of the equivalent value (R$) of Non-Monetary-BS agreements between users and the Union invested in projects.
- Value of "Non-Monetary BS" – Agreement between users and the Traditional Providers/Communities (ATK); Total number of Non-Monetary-BS agreements with ATK Providers received by the MMA; Total number of Non-Monetary-BS agreements already signed between users and ATK; Total of the equivalent value (R$) of Non-Monetary-BS agreements between users and the ATK Providers already invested into projects

Operation cost of ABS policy

- Composition, by positions and number of employees, of the current Genetic Heritage Department (DGH) team of MMA
- Total personnel expenses (salaries) of the DGH teams for the periods 20xx to 20xx in R$
- Total additional expenses with travel, meetings, training, and other expenses related to CGen activities [daily servers; daily board members; national and international passages and stenotype] of DGH teams and board members for the periods 20xx to 20xx in R$
- Total amount of SisGen and SisGen-Research software development contracts
